# Supplementary material
Source: MDPI journal article supplement (https://www.mdpi.com/2073-8994/15/8/1532)
Supplement: s1 [file s1]

## **Supporting information:**

### **Nitrogen and phosphorus co-doped carbon dots for the growth promotion of water spinach**

*Fan Yu<sup>1</sup>, Mengqi She<sup>1</sup>, Xia Cai<sup>1</sup>, Xiaoyan Li<sup>1</sup>, Yuan Huang<sup>2,3,4</sup>, Hongwei Lei<sup>1\*</sup> and Zuojun Tan<sup>1,3,4\*</sup>*

<sup>1</sup>College of Engineering, Huazhong Agricultural University, Wuhan 430070, China

<sup>2</sup>College of Horticulture and Forestry Sciences, Huazhong Agricultural University, Wuhan 430070, China

<sup>3</sup>Shenzhen Institute of Nutrition and Health, Huazhong Agricultural University, Shenzhen 518000, China

<sup>4</sup>Shenzhen Branch, Guangdong Laboratory for Lingnan Modern Agriculture, Genome Analysis Laboratory of the Ministry of Agriculture, Agricultural Genomics Institute at Shenzhen, Chinese Academy of Agricultural Sciences, Shenzhen 518000, China

**Table S1.** Effect of different concentrations of carbon dots on the mean values of plant height, stem thickness, maximum functional leaf area, and number of leaves of water spinach under the leaf spraying method. Different letters indicate significant differences for the respective parameters at  $p < 0.05$ .

| Concentration (mg/L) | Height (cm)     | stem thickness (cm) | Maximum functional leaf area (cm <sup>2</sup> ) | The mean number of leaves |
|----------------------|-----------------|---------------------|-------------------------------------------------|---------------------------|
| 0                    | 40.505 ± 4.549a | 4.535 ± 0.593c      | 4.740 ± 0.174a                                  | 8.333 ± 0.816c            |
| 25                   | 40.781 ± 3.911a | 5.233 ± 0.853ab     | 6.463 ± 0.126ab                                 | 9.000 ± 0.894ab           |
| 50                   | 40.815 ± 2.112a | 5.527 ± 0.515a      | 6.525 ± 0.621a                                  | 10.17 ± 1.472a            |
| 100                  | 38.488 ± 3.408a | 4.694 ± 0.535ab     | 5.625 ± 0.1791a                                 | 9.000 ± 0.632ab           |
| 200                  | 35.935 ± 3.949a | 4.646 ± 0.473ab     | 5.099 ± 0.122a                                  | 8.667 ± 0.816ab           |
| 400                  | 26.227 ± 2.821b | 3.616 ± 0.419d      | 3.542 ± 0.740ab                                 | 7.833 ± 0.983c            |

**Table S2.** Effect of different concentrations of carbon dots on the mean values of plant height, stem thickness, maximum functional leaf area, and number of leaves of water spinach under the root spraying method. Different letters indicate significant differences for the respective parameters at  $p < 0.05$ .

| Concentration (mg/L) | Height (cm)     | stem thickness (cm) | Maximum functional leaf area (cm <sup>2</sup> ) | The mean number of leaves |
|----------------------|-----------------|---------------------|-------------------------------------------------|---------------------------|
| 0                    | 40.505 ± 4.549a | 4.535 ± 0.593b      | 4.740 ± 0.174a                                  | 8.333 ± 0.816b            |
| 25                   | 43.325 ± 7.082a | 5.011 ± 0.603b      | 6.442 ± 0.256a                                  | 9.167 ± 1.169ab           |
| 50                   | 44.200 ± 3.416a | 5.518 ± 0.687ab     | 6.508 ± 0.161a                                  | 9.500 ± 0.837a            |
| 100                  | 45.990 ± 5.372a | 6.322 ± 0.395a      | 7.097 ± 0.208a                                  | 10.33 ± 1.633a            |
| 200                  | 42.283 ± 6.035a | 5.485 ± 0.574ab     | 4.838 ± 0.114a                                  | 9.333 ± 1.033a            |
| 400                  | 33.767 ± 3.543b | 4.683 ± 0.503b      | 4.435 ± 0.144a                                  | 8.167 ± 1.329b            |
